# Supplementary material
Source: publisher figshare collection journal article supplement (https://frontiersin.figshare.com/ndownloader/files/28809660)
Supplement: Supplementary file 1 [file 28809660]

**Supplementary Table 3.** Output of the linear model testing foliar C, N, and C:N ratios among genera with high, medium, and low wood density. SE: standard error of the coefficients; *t*: value of the *t* statistics; *p*: level of probability.

| **Coefficient** | **Estimate** | **SE** | ***t*** | ***p*** |
| --- | --- | --- | --- | --- |
| **C** |  |  |  |  |
| Intercept | 48.87 | 0.38 | 127.0 | <0.01 |
| Low density | -1.34 | 0.52 | -2.6 | <0.01 |
| Medium density | -1.69 | 0.51 | -3.3 | <0.01 |
|  |  |  |  |  |
| **N** |  |  |  |  |
| Intercept | 2.09 | 0.08 | 26.8 | <0.01 |
| Low density | 0.12 | 0.11 | 1.1 | 0.25 |
| Medium density | 0.13 | 0.10 | 1.2 | 0.23 |
|  |  |  |  |  |
| **C:N ratio** |  |  |  |  |
| Intercept | 26.65 | 0.95 | 28.0 | <0.01 |
| Low density | -2.56 | 1.28 | -2.0 | 0.05 |
| Medium density | -2.00 | 1.26 | -1.6 | 0.11 |
